# Supplementary material for: Survival and Detection of Bivalve Transmissible Neoplasia from the Soft-Shell Clam Mya arenaria (MarBTN) in Seawater
Source: MDPI journal article supplement (doi:10.3390/pathogens11030283), 2022-02-23
Supplement: s1 [file s1]

Table S1. Collection information of soft-shell clams (*Mya arenaria*) used in this study

| Animal ID | Cancer in hemolymph <sup>1</sup> | Arrival date | Harvest location | Figure (color)                   |
|-----------|----------------------------------|--------------|------------------|----------------------------------|
| FFM-4D7   | 100%                             | 10/22/2019   | Lubec, ME        | 1A (orange)                      |
| FFM-4G8   | 100%                             | 10/22/2019   | Lubec, ME        | 1A (blue)                        |
| FFM-6B8   | 75%                              | 10/31/2019   | Brunswick, ME    | 1A (grey)                        |
| FFM-26C1  | 100%                             | 10/1/2021    | Friendship, ME   | 1B, 2, S2 (blue)                 |
| FFM-26C9  | 100%                             | 10/7/2021    | Friendship, ME   | 1B & S4 (orange)                 |
| FFM-26D8  | 100%                             | 10/7/2021    | Friendship, ME   | 1B, 2, S2 (grey)                 |
| FFM-5D4   | 75%                              | 10/31/2019   | Brunswick, ME    | 1C (light blue)                  |
| FFM-7A12  | 100%                             | 12/10/2019   | Jonesport, ME    | 1C (green)                       |
| FFM-7F4   | 100%                             | 12/10/2019   | Jonesport, ME    | 1C (dark blue)                   |
| FFM-8C3   | 100%                             | 1/7/2020     | Brunswick, ME    | 1C (orange)                      |
| FFM-9A1   | 100%                             | 1/7/2020     | Brunswick, ME    | 1C (blue)                        |
| FFM-9A12  | 100%                             | 1/7/2020     | Brunswick, ME    | 1C (grey)                        |
| FFM-26C10 | 100%                             | 10/7/2021    | Friendship, ME   | 2 & S2 (orange)<br>S4 (grey), S1 |
| MLN-4D6   | 0%                               | 1/29/2019    | ME               | 3, S3                            |
| MLN-5D6   | 100%                             | 2/19/2019    | ME               | 3, S3                            |
| MLN-5E4   | 100%                             | 2/19/2019    | ME               | 3, S3                            |
| FFM-26C4  | 100%                             | 10/7/2021    | Friendship, ME   | S4 (blue)                        |

<sup>1</sup> Cancer in hemolymph was first estimated through microscopic analysis of hemolymph. Only highly diseased animals were selected for use as donors for BTN cell survival experiments

Table S2. List of tested antimicrobial drugs and concentrations

| Drug                | Concentration  | Parasite growth | Toxic to BTN        |
|---------------------|----------------|-----------------|---------------------|
| Triclosan           | 1 $\mu$ M      | Y               | N                   |
|                     | 10 $\mu$ M     | Y               | N                   |
|                     | 50 $\mu$ M     | Y               | Y                   |
|                     | 100 $\mu$ M    | Y               | Y                   |
| Doxycycline         | 1 $\mu$ g/mL   | Y               | N                   |
|                     | 10 $\mu$ g/mL  | Y               | N                   |
|                     | 100 $\mu$ g/mL | Y               | N                   |
| Moxifloxacin        | 1 $\mu$ g/mL   | Y               | N                   |
|                     | 10 $\mu$ g/mL  | Y               | N                   |
|                     | 100 $\mu$ g/mL | Y               | N                   |
|                     | 1 mg/mL        | Y               | N                   |
|                     | 2 mg/mL        | Y               | N                   |
|                     | 4 mg/mL        | Y               | Y                   |
|                     | 6 mg/mL        | Y               | Y                   |
|                     | 10 mg/mL       | Y               | Y                   |
|                     | 100 mg/mL      | N               | N                   |
| Metronidazole       | 1 $\mu$ g/mL   | Y               | N                   |
|                     | 10 $\mu$ g/mL  | Y               | N                   |
|                     | 100 $\mu$ g/mL | Y               | N                   |
|                     | 1 mg/mL        | Y               | N                   |
|                     | 2 mg/mL        | Y               | N                   |
|                     | 4 mg/mL        | Y               | N                   |
|                     | 6 mg/mL        | N               | Y                   |
|                     | 10 mg/mL       | N               | Y                   |
| <b>Voriconazole</b> | 10 $\mu$ M     | Y               | N                   |
|                     | 100 $\mu$ M    | Y               | N                   |
|                     | 500 $\mu$ M    | Y               | N                   |
|                     | 750 $\mu$ M    | Y               | N                   |
|                     | <b>1 mM</b>    | <b>N</b>        | <b>N</b>            |
|                     | 1.25 mM        | N               | alive, but clumping |
|                     | 1.5 mM         | N               | alive, but clumping |
|                     | 2 mM           | N               | Y                   |

Table S3. Primers used in qPCR and cloning

| qPCR target     | Control plasmid        | Primer name                                                                                                     | Primer Sequence (5'-3')                                                                                                        |
|-----------------|------------------------|-----------------------------------------------------------------------------------------------------------------|--------------------------------------------------------------------------------------------------------------------------------|
| Cancer-N1N2     | pCR-SteamerLTR-N1N2    | ClamLTR-F3<br>N1N2can-R3                                                                                        | TTCAATCATTCAACGCATAACC<br>TCGCTGAGAATTTTTCGGTGT                                                                                |
| Total-N1N2      | pCR-SteamerLTR-N1N2    | N1N2-F3<br>N1N2-R1                                                                                              | CCCAGGGCAAGAGGAATATGGT<br>GGATACTGCAAGCTTCTTGGAA                                                                               |
| Cancer-HL03     | pIMHL03c2-EF1 $\alpha$ | ClamLTRF2<br>IMHLO3c2-R2                                                                                        | ACATGCACATTAAAAGTTATCG<br>TCTGGGTCATGAATAACGTCA                                                                                |
| EF1 $\alpha$    | pIMHL03c2-EF1 $\alpha$ | ClamEF1-F3<br>ClamEF1-R2                                                                                        | GGGAAAAGAGGGCAAGGTGAC<br>TTTCTTCTTCCCACCGACTGC                                                                                 |
| Cloning primers |                        |                                                                                                                 |                                                                                                                                |
|                 | pCR-SteamerLTR-N1N2    | ClamLTR-F2<br>98171_conR1                                                                                       | ACATGCACATTAAAAGTTATCG<br>GGATACTGCAAGCTTCTTGGAA                                                                               |
|                 | pIMHL03c2-EF1 $\alpha$ | ClamLTR-F2 <sup>1</sup><br>ClamLTR-R1 <sup>1</sup><br>ClamA-EF1aFor <sup>2</sup><br>ClamNS-EF1aRev <sup>2</sup> | ACATGCACATTAAAAGTTATCG<br>TTAGTATAGCCAATACTGTTAC<br>tagggcccGAAGGATGAGGGAAAAGAGGG<br>atGCGGCCGCatcctgcaggCACCTTTTCCTGCTATGGTGC |

<sup>1</sup> Cloning of the *Steamer* fragment to generate pIMHL03c2 was done via inverse PCR, as described in Arriagada et al. 2014.

<sup>2</sup> Primers were used to amplify *EF1 $\alpha$*  from genomic DNA, the product was cut with *Apal* and *NotI* (NEB), and ligated into pIMHL03c2.
